# Supplementary material
Source: PubMed Central journal article supplement (PMC4501265)

Supplementary Figure 1: Funnel plot. Estimated treatment effect on viral load (VL) difference by inverse of estimated within-study variance (weight).

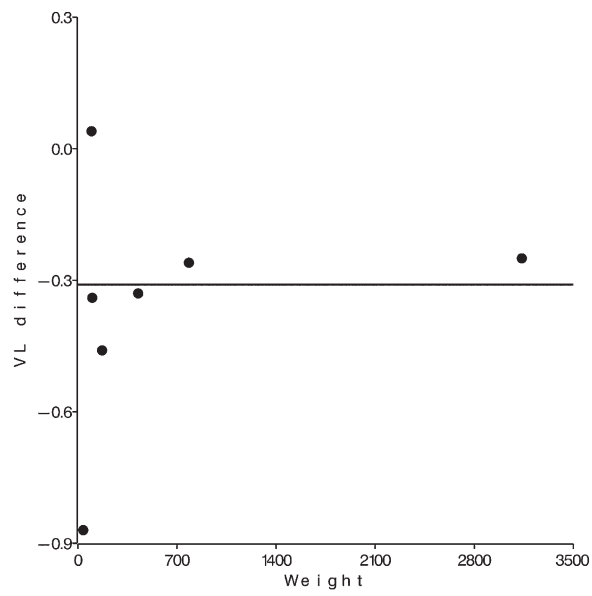

Supplementary Figure 2: Forest plots by median age, compliance, publication year, trial length, location, drug preparation, and trial type. The null association is shown as the solid horizontal line. The pooled estimate  $-0.33 \log_{10}$  copies/mL (95% CI:  $-0.56, -0.10$ ) is shown as the dashed horizontal line.

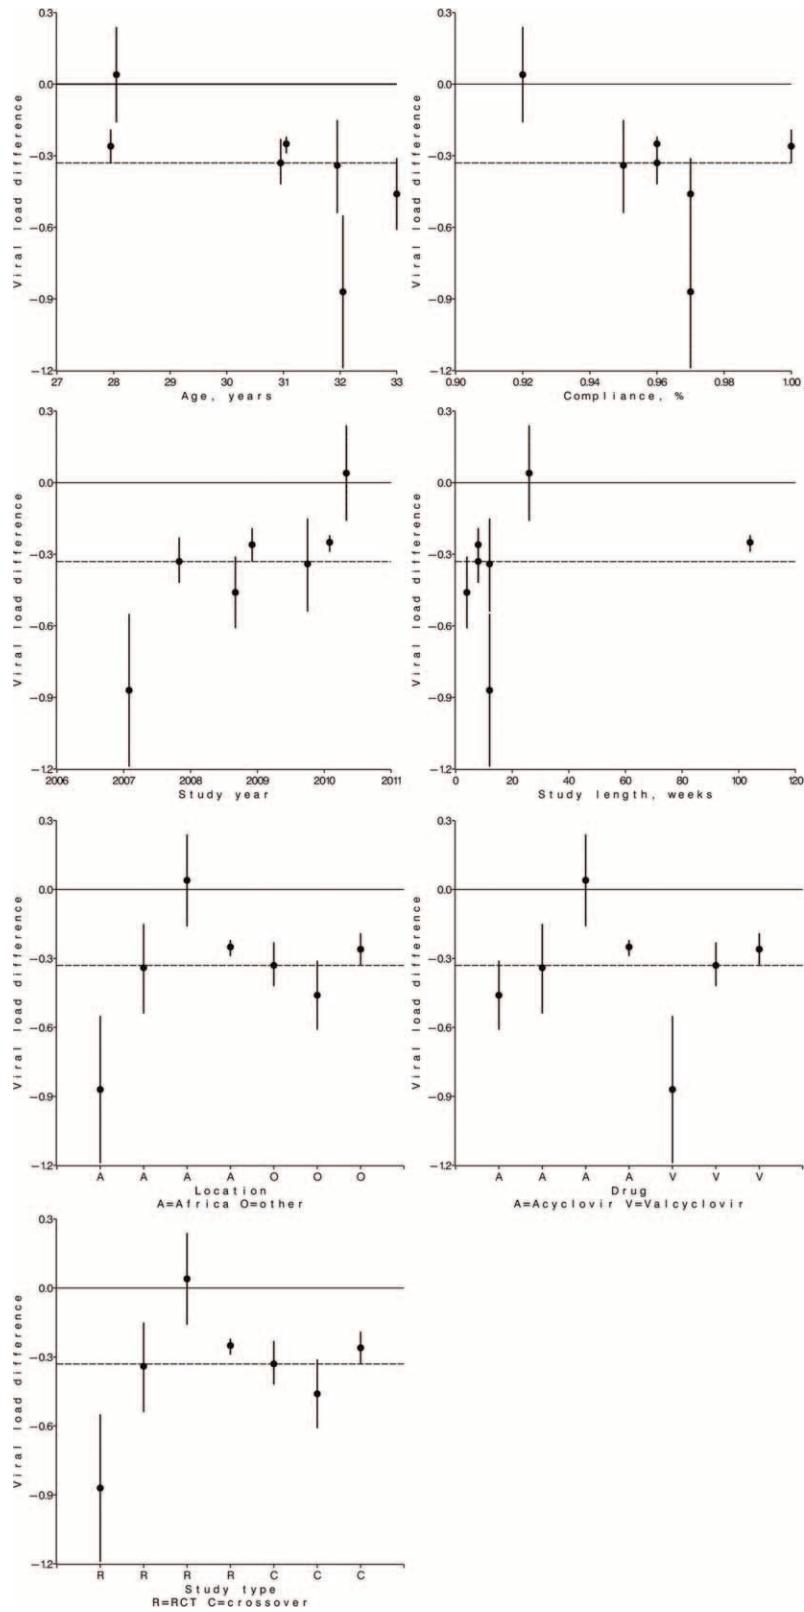

Supplement: NIHMS701799-supplement-Supplemental.pdf [file NIHMS701799-supplement-Supplemental.pdf]
